# Supplementary material for: Interfacial pH and polarity detection of amphiphilic self-assemblies using a single Schiff-base molecule
Source: Royal Society of Chemistry journal article supplement (doi:10.1039/c7nj01222e), 2017-01-01
Supplement: c7nj01222e1.pdf [file c7nj01222e1.pdf]

## Supporting Information

### Interfacial pH and polarity detection of amphiphilic self-assemblies using a single Schiff-base molecule

Rini Majumder,<sup>a</sup> Yeasmin Sarkar,<sup>a</sup> Sanju Das,<sup>a,b</sup> Ambarish Ray,<sup>b</sup> and Partha Pratim Parui<sup>\*a</sup>

<sup>a</sup>Department of Chemistry, Jadavpur University, Kolkata 700032, India.

<sup>b</sup>Department of Chemistry, Maulana Azad College, Kolkata 700013, India.

#### Contents

|                                                                             |           |
|-----------------------------------------------------------------------------|-----------|
| 1. Fluorescence transient decay analysis of SBOH-Z-SBOH                     | ... p S2  |
| 2. Theoretically calculated UV-Vis absorption parameters                    | ... p S3  |
| 3. Fluorescence anisotropic decay analysis                                  | ... p S4  |
| 4. <sup>1</sup> H and <sup>13</sup> C NMR spectra of SBOH-Z-SBOH            | ... p S5  |
| 5. ESI-MS <sup>+</sup> spectra of SBOH-Z-SBOH                               | ... p S6  |
| 6. pH dependent reversible spectral changes for SBOH-Z-SBOH                 | ... p S7  |
| 7. pH dependent fluorescence spectra of SBOH-Z-SBOH                         | ... p S8  |
| 8. UV-Vis absorption studies of SBOH-Z-SBOH in THF/buffer at different pH   | ... p S9  |
| 9. Solvent composition dependent UV-Vis absorption studies of SBOH-Z-SBOH   | ... p S10 |
| 10. Solvent property dependent absorption profile of SBOH-Z-SBOH            | ... p S11 |
| 11. Polarity dependent reversible spectral changes for SBOH-Z-SBOH          | ... p S12 |
| 12. Absorption spectra of SBOH-Z-SBOH with amphiphilic molecules            | ... p S13 |
| 13. Fluorescence Anisotropy decays                                          | ... p S14 |
| 14. Absorption spectra for binding studies                                  | ... p S15 |
| 15. Absorption spectra of SBOH-Z-SBOH with SDS micelle                      | ... p S16 |
| 16. pH-metric titration profile of SBOH-Z-SBOH at different medium polarity | ... p S17 |
| 17. UV-Vis absorption spectra at various pH and polarity                    | ... p S18 |

**Table S1:** Fluorescence transient decay parameters of SBOH-Z-SBOH (5.0  $\mu\text{M}$ ) with residual of fitting ( $\chi^2$ ) in aqueous buffer solution at different pH values. Excitation and emission wavelengths were 450 and 500/530 nm respectively.

| pH   | Life time<br>(ns) | $\chi^2$ |
|------|-------------------|----------|
| 7.0  | 0.47<br>–         | 1.02     |
| 9.8  | 0.51<br>4.31      | 1.05     |
| 11.0 | 4.79<br>–         | 1.01     |

**Table S2:** Electronic excitation wavelength (nm), oscillator strengths ( $f_{\text{cal}}$ ), absorption maximum ( $\lambda_{\text{max}}$ ) and extinction coefficient ( $\epsilon$ ) of non-ionic ( $\text{SBOH}^0\text{-Z-SBOH}^0$ ), partially zwitterionic ( $\text{SBOH}^0\text{-Z-SBOH}^\pm$ ), di-anionic ( $\text{SBO}^-\text{-Z-SBO}^-$ ) forms obtained by the TD-DFT/B3LYP/6-31G++(d,p) calculation on ground state geometries in various solvent with CPCM dielectric solvation model. The experimentally obtained UV-Vis absorption (Obs/Abs) parameters for SBOH-Z-SBOH are depicted for comparison.

|         | <b>Form</b>                       | <b>Solvent</b>     | $\lambda_{\text{max}}$<br>(nm) | $f_{\text{cal}}$ | $\epsilon \times 10^{-4}$<br>( $\text{M}^{-1}\text{cm}^{-1}$ ) |
|---------|-----------------------------------|--------------------|--------------------------------|------------------|----------------------------------------------------------------|
|         | $\text{SBOH}^0\text{-Z-SBOH}^0$   | THF                | 315                            | 0.160            | 0.887                                                          |
| TD-DFT  | $\text{SBOH}^0\text{-Z-SBOH}^\pm$ | Water              | 385                            | 0.132            | 0.657                                                          |
|         |                                   |                    | 315                            | 0.098            | 0.582                                                          |
|         | $\text{SBO}^-\text{-Z-SBO}^-$     | Water              | 390                            | 0.203            | 1.205                                                          |
|         |                                   | THF                | 330                            |                  | 1.005                                                          |
| Obs/Abs | SOBH-Z-SOBH                       | Buffer,<br>pH 7.0  | 420                            | -                | 0.629                                                          |
|         |                                   |                    | 330                            |                  | 0.454                                                          |
|         |                                   | Buffer,<br>pH 11.0 | 395                            |                  | 1.103                                                          |

**Table S3:** The correlation time ( $\tau_c$ ) with residual of single exponential fitting ( $\chi^2$ ) for SBOH-Z-SBOH (5.0  $\mu\text{M}$ ) obtained from fluorescence anisotropic decays in presence of different self-assembled systems at pH 10.5.

| <b>system</b> | <b><math>\tau_c</math><br/>(ns)</b> | <b><math>\chi^2</math></b> |
|---------------|-------------------------------------|----------------------------|
| Buffer        | 0.63                                | 1.02                       |
| CTAB          | 1.90                                | 1.03                       |
| DDAB          | 2.01                                | 0.98                       |
| TX-100        | 1.02                                | 1.09                       |
| DOPC          | 1.11                                | 1.03                       |

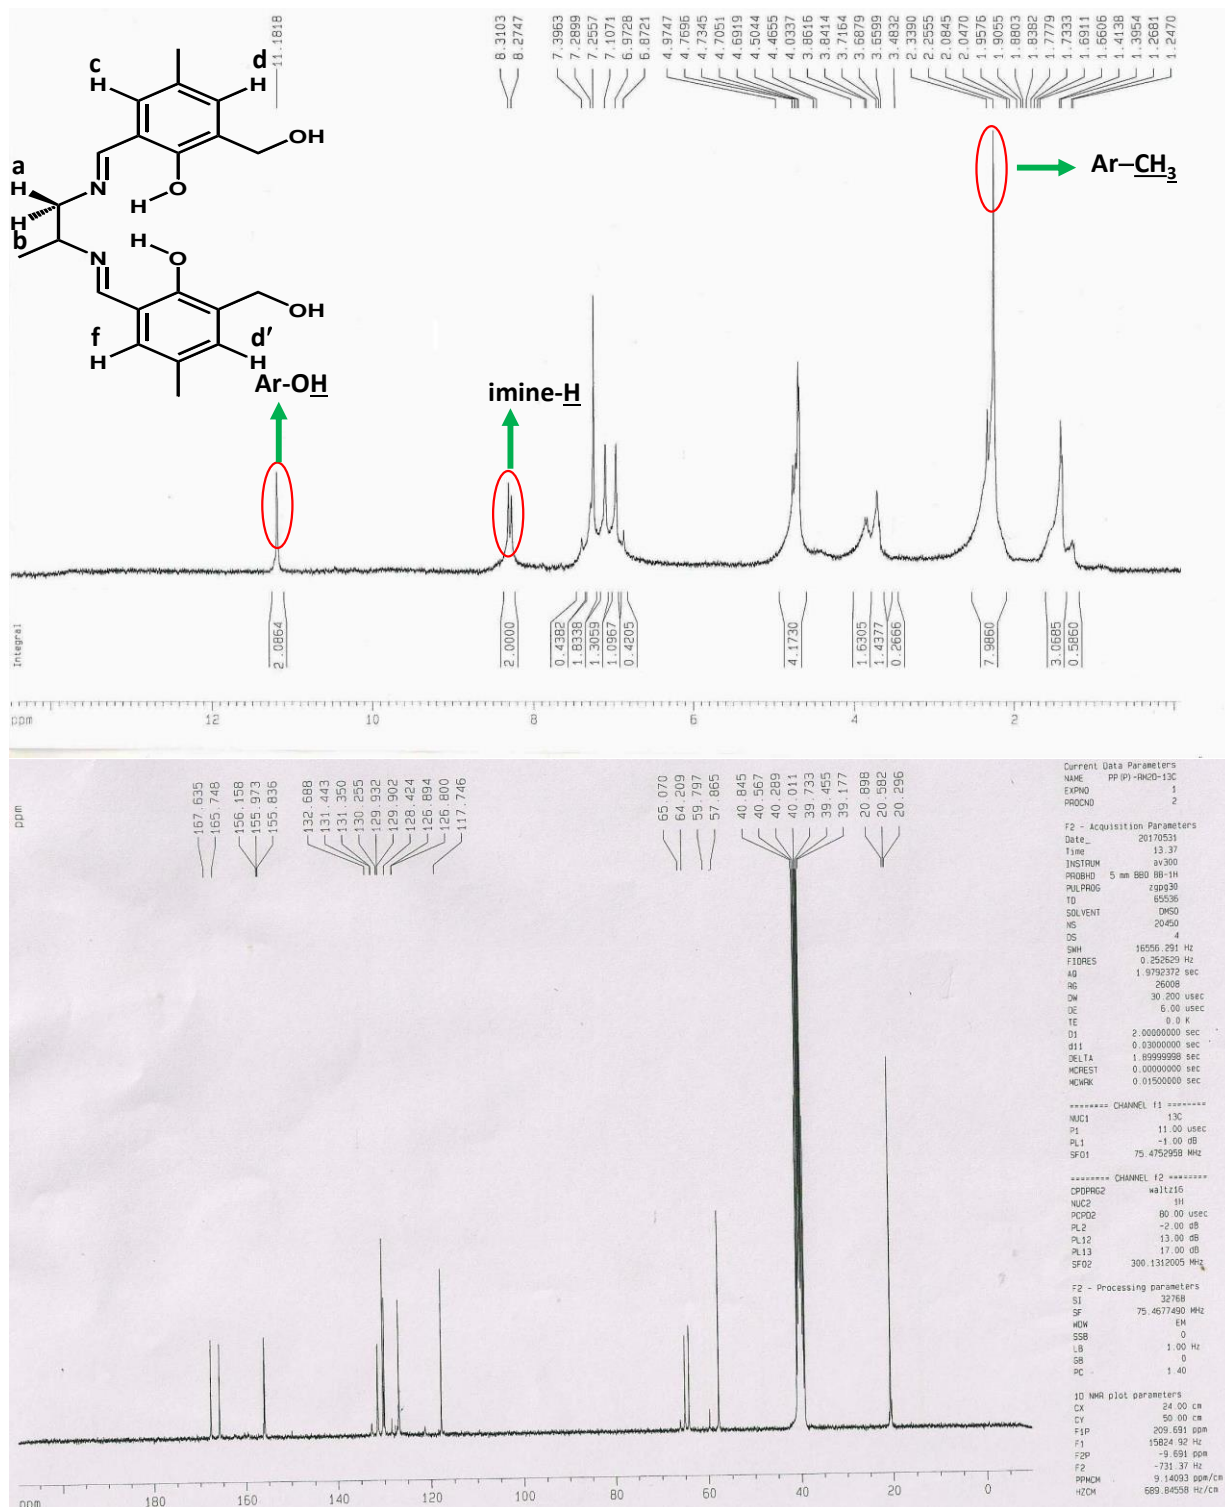

Fig. S1. <sup>1</sup>H and <sup>13</sup>C NMR spectra of SBOH-Z-SBOH in CDCl<sub>3</sub> and DMSO-d<sub>6</sub> respectively.

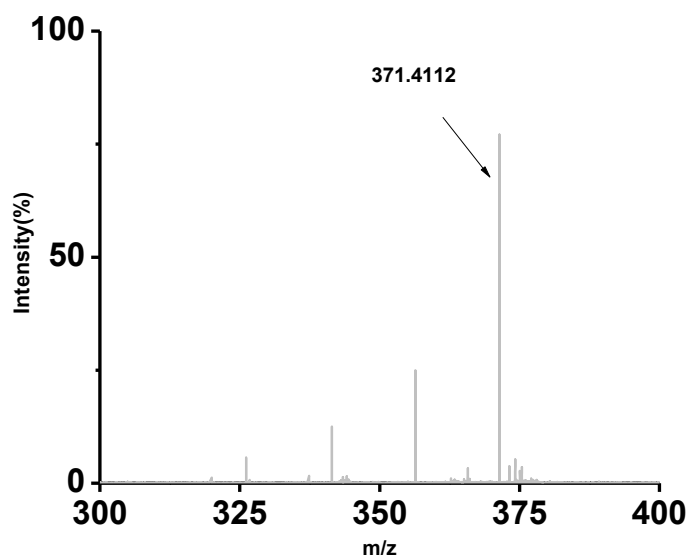

**Fig. S2.** ESI-MS<sup>+</sup> spectra of SBOH-Z-SBOH in water: m/z for [SBOH-Z-SBOH+H]<sup>+</sup>: obs'd – 371.4112, cal'd – 371.44848)

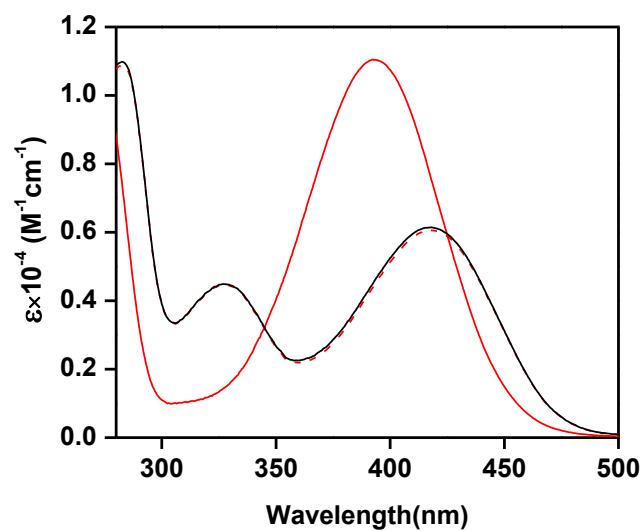

**Fig. S3.** pH dependent UV-Vis absorption spectral changes of SBOH-Z-SBOH (5.0 μM) in buffer medium. The pH was increased from 7.0 (black) to 12.0 (red) by an addition of 0.1 M NaOH and subsequently decreased to 7.0 (red, broken) by an addition of 0.1 M HCl in 20 mM tris-HCl buffer.

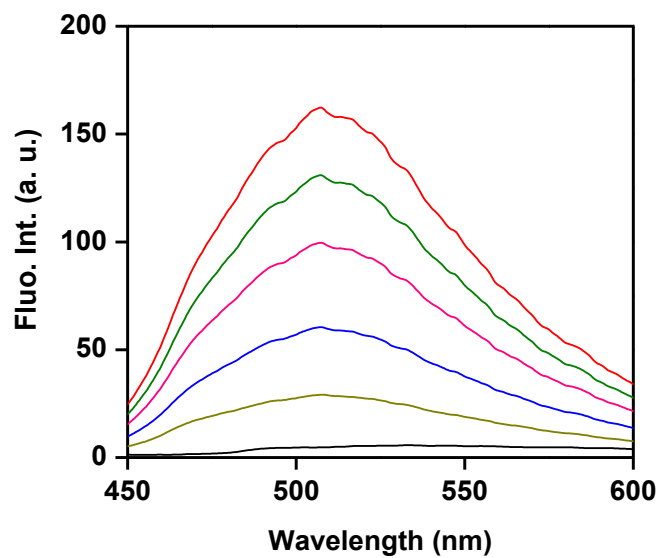

**Fig. S4.** Fluorescence spectra of SBOH-Z-SBOH (5.0 μM) in buffer/THF mixed medium at different dielectric constants (wt % of THF in the mixtures are depicted in bracket): black, 8.0 (1.0); dark yellow, 18.3 (0.8); blue, 32.0 (0.6); pink, 48.2 (0.4); green, 64.6 (0.2); and red, 78.5 (0.0).



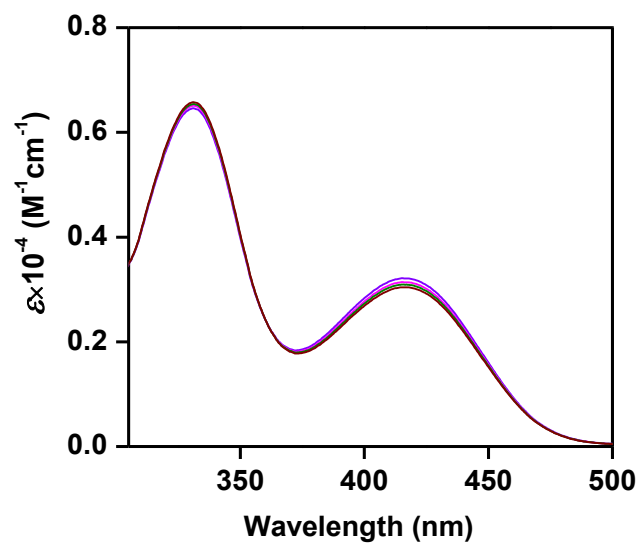

**Fig. S5.** UV-Vis absorption spectra of SBOH-Z-SBOH (5.0  $\mu\text{M}$ ) in 1:1 THF/buffer solution at different pH: violet, 5.5; brown, 7.0; pink, 8.0; green, 10.0.

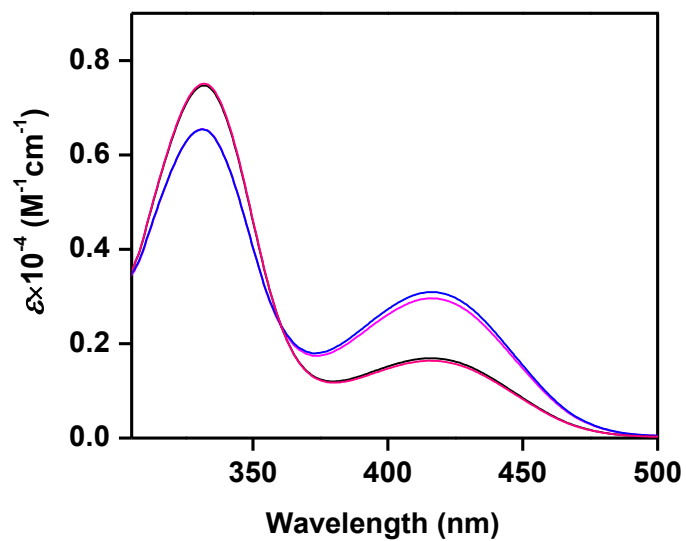

**Fig. S6.** Solvent composition dependent UV-Vis absorption spectra of SBOH-Z-SBOH (5.0  $\mu\text{M}$ ): pink, acetonitrile ( $\kappa \sim 37.5$ ); blue, THF/water mixture (52.5% (w/w) THF in the mixture,  $\kappa \sim 37.5$ ); red, THF/water mixture (70% (w/w) THF in the mixture,  $\kappa \sim 24.5$ ); black, EtOH ( $\kappa \sim 24.5$ ).

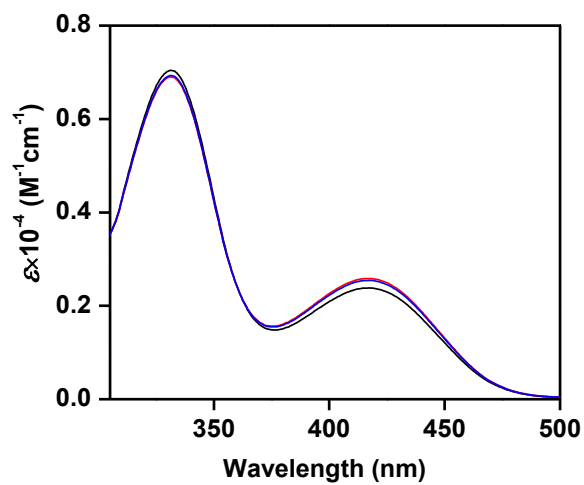

**Fig. S7.** UV-Vis absorption spectra of SBOH-Z-SBOH (5.0  $\mu\text{M}$ ) under identical  $\kappa$  ( $\sim 37.5$ ) at pH 8.0: red, buffer/EtOH mixed medium (75% (w/w) EtOH in the mixture); blue, acetonitrile; black, buffer/glycerol mixed medium (80% (w/w) glycerol in the mixture).

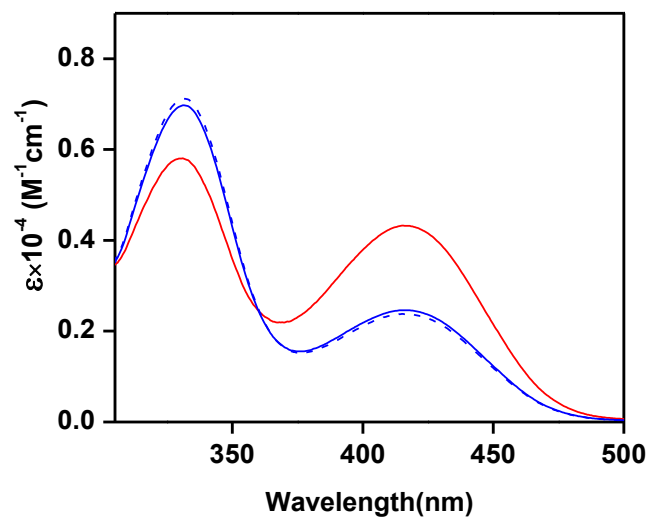

**Fig. S8.** Solvent dielectric constant ( $\kappa$ ) dependent UV-Vis absorption spectral change of SBOH-Z-SBOH (5.0  $\mu$ M). The  $\kappa$  was increased for the mixed MeOH medium from 33.0 (blue) for pure MeOH to 55.0 (red) by an addition of water (50% (w/w) of water in the MeOH/water mixture) and subsequently decreased to 33.0 (broken, blue) by addition of THF (48 and 26% (w/w) of THF and water in THF/water/MeOH mixture, respectively).

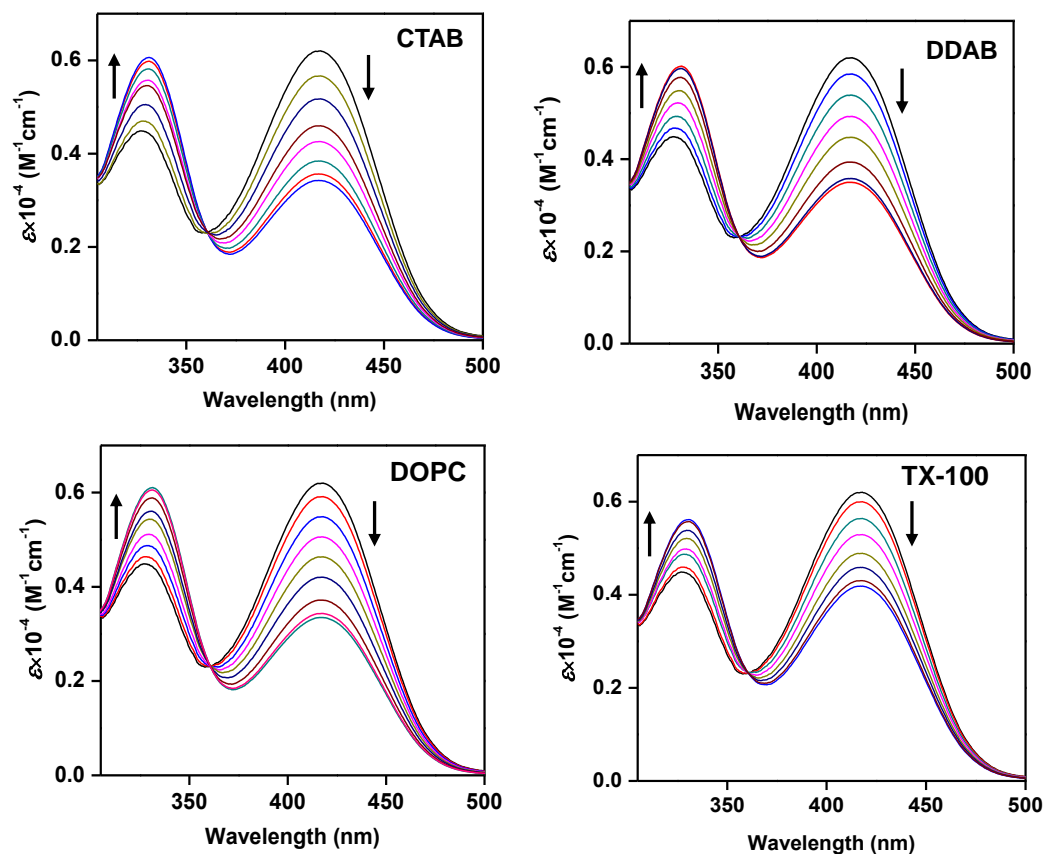

**Fig. S9.** UV-Vis absorption spectra of SBOH-Z-SBOH (5.0 μM) in presence of increasing concentration of different self-assembled systems in 20 buffer, pH 7.0: CTAB (0–5.0 mM), DDAB (0–3.0 mM), TX-100 (0–6.0 mM) and DOPC (0–4.0 mM).

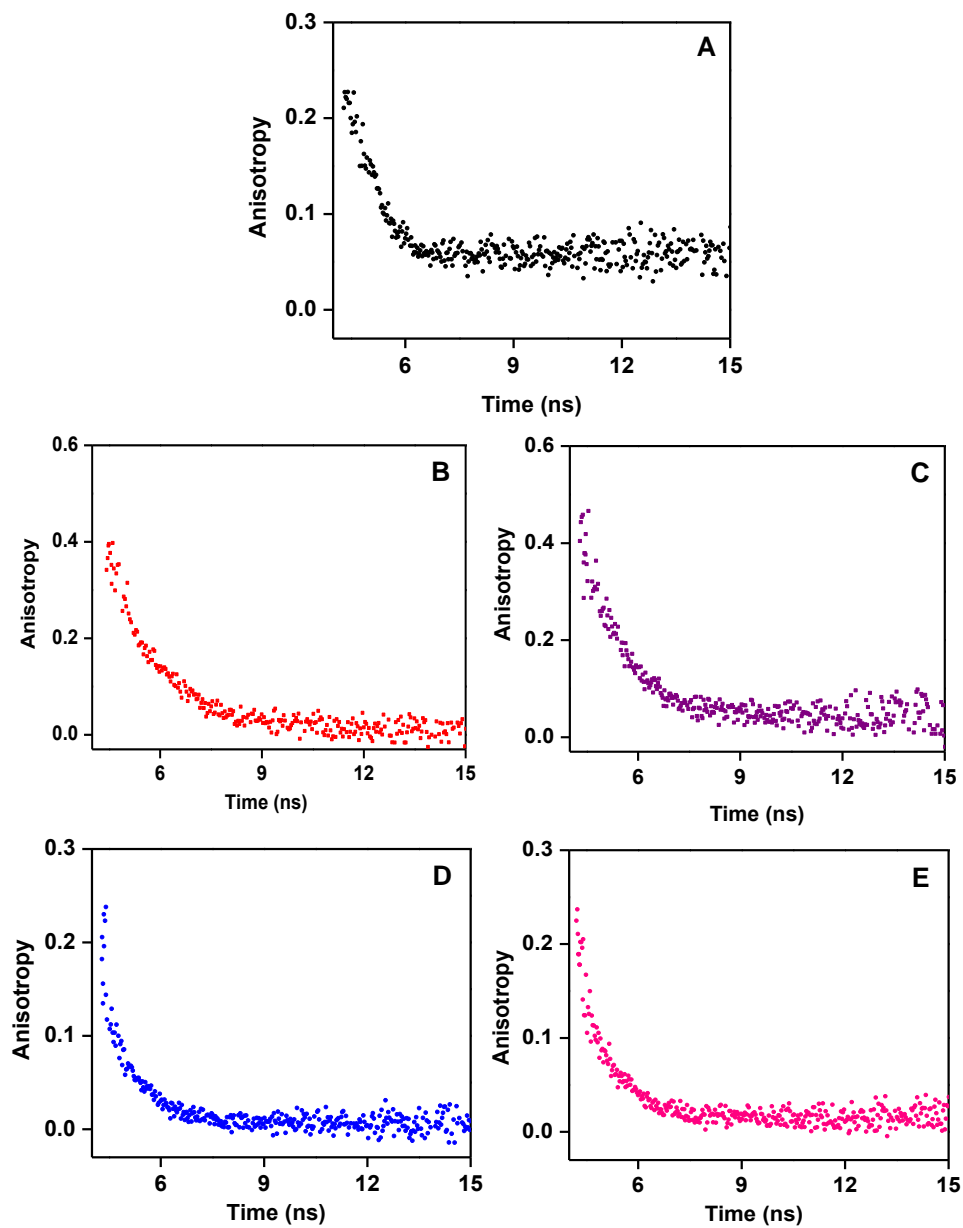

**Fig. S10.** Fluorescence anisotropic decay curves of SBOH-Z-SBOH ( $5.0 \mu\text{M}$ ) in (A) absence and (B–E) presence of deviation saturated concentration of different self-assembled systems at pH 10.5: (B), CTAB ( $5.0 \text{ mM}$ ); (C), DDAB ( $3.0 \text{ mM}$ ); (D), TX-100 ( $6.0 \text{ mM}$ ) and (E) DOPC ( $4.0 \text{ mM}$ ).

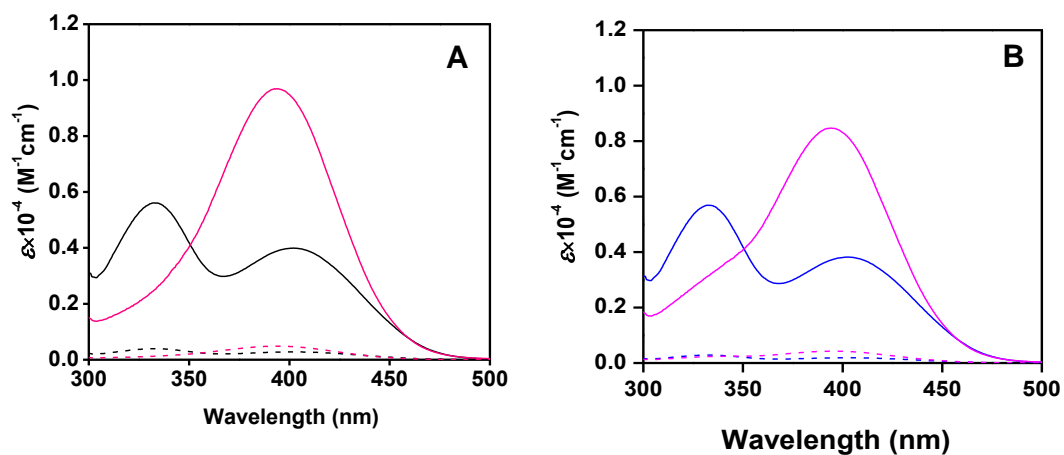

**Fig. S11.** UV-Vis absorption spectra of SBOH-Z-SBOH (5.0  $\mu\text{M}$ ) in presence (solid) of different deviation-saturated concentration of ULVs, and (broken) its filtrated solution: (A) DDAB: red, pH 9.0; black, pH 8.0. (B) DOPC: pink, pH 11.5; blue, pH 10.5. The filtrated solution was obtained using a 100K MW cut-off filter.

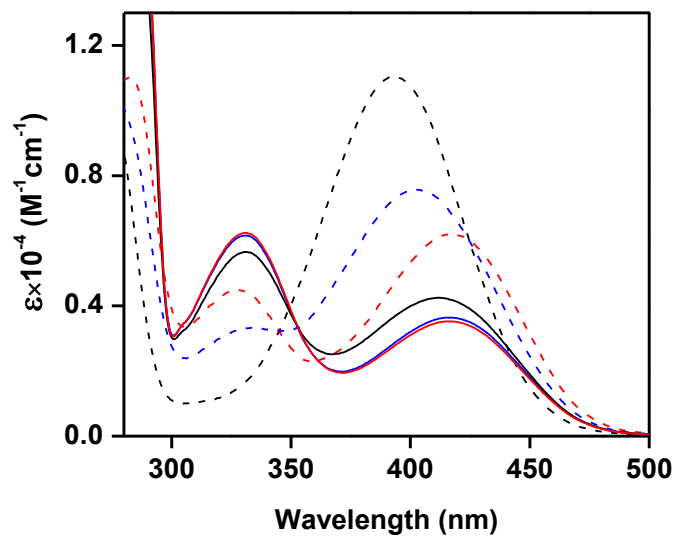

**Fig. S12.** UV-Vis absorption spectra of SBOH-Z-SBOH (5.0  $\mu\text{M}$ ) in the absence (dash) and in presence of SDS (solid) in different pH: black, pH 12.5; blue, pH 9.5; red, pH 7.0.



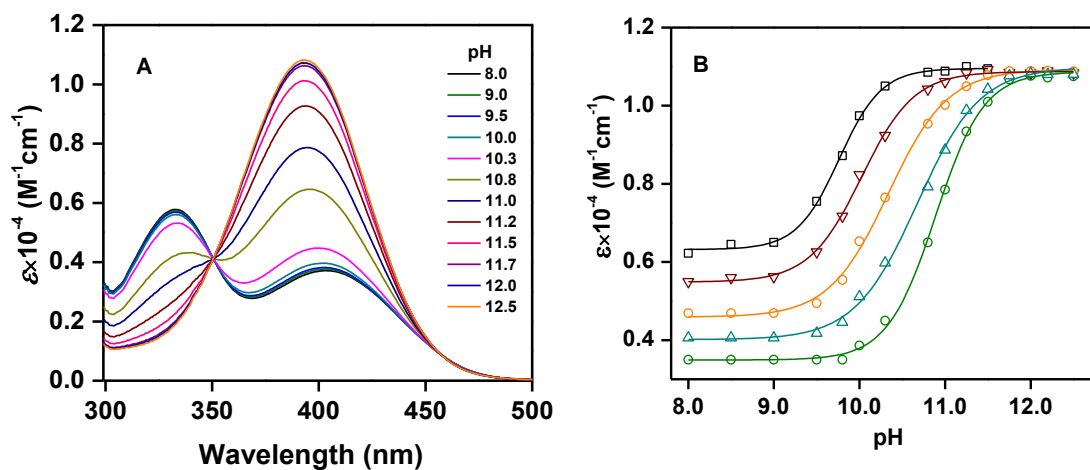

**Fig. S13.** (A) pH dependent UV-Vis absorption spectra of SBOH-Z-SBOH (5.0  $\mu\text{M}$ ) in 53% (w/w) ethanol containing buffer medium. (B) Molar extinction coefficient ( $\epsilon$ ) at the absorption intensity maxima (395–420 nm) at different pH under different solvent polarity ( $\kappa$ ) of ethanol/buffer mixed: black, 78.5; brown, 70.0; orange, 60.0; cyan, 50.0; green, 43.0.

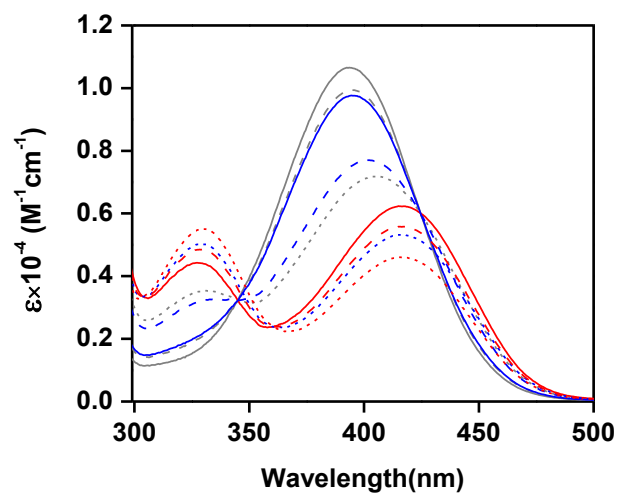

**Fig. S14.** UV-Vis absorption spectra of SBOH-Z-SBOH (5.0 μM) in buffer of different pH (10.8, gray; 10.0, blue; 8.0, red) and  $\kappa$  (solid, 72.0; short dash, 48.0; broken, 25.0) of the medium.
